# Supplementary material for: Terpene synthases from Cannabis sativa
Source: PubMed Central journal article supplement (PMC5371325; doi:10.1371/journal.pone.0173911), 2017-03-29

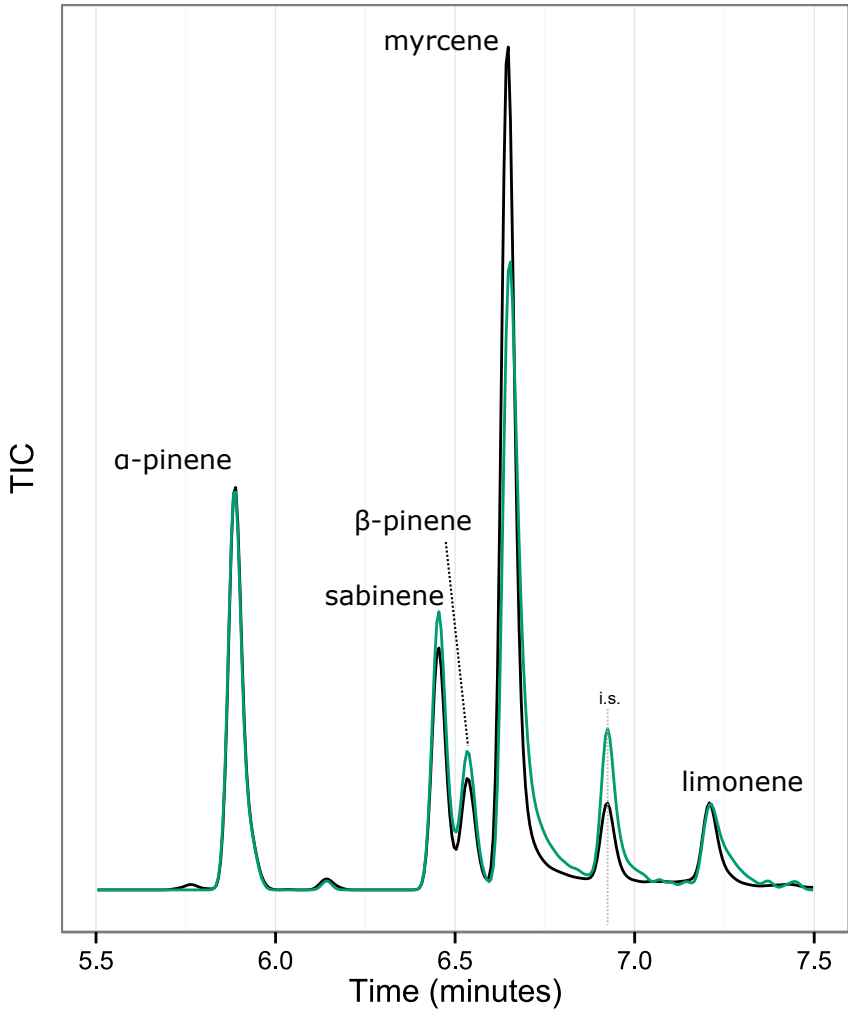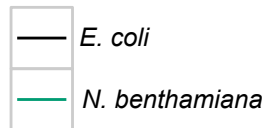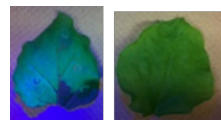

Supplement: pone.0173911.s007.pdf [file pone.0173911.s007.pdf]
